# Supplementary material for: Magnetic Fe NPs as a peroxidase nanozyme for sensitive and rapid colorimetric monitoring of H2O2 and xanthine
Source: Royal Society of Chemistry journal article supplement (doi:10.1039/d3nj02059b), 2023-01-01
Supplement: d3nj02059b1.pdf [file d3nj02059b1.pdf]

## Supporting Information

### **Magnetic Fe NPs as Peroxidase Nanozyme for Sensitive and Rapid Colorimetric Monitoring of H<sub>2</sub>O<sub>2</sub> and Xanthine**

Yan Wu <sup>a, b\*</sup>, Mengjie He <sup>a</sup>, Honghui Zang <sup>c</sup>, Junli Wang <sup>a</sup>, Jing Li <sup>a</sup>, Ting Yue <sup>a</sup>, Rong Xu <sup>a</sup>, Yueshan Jiang <sup>a</sup>, Fang Zhao <sup>a</sup> and Siyi Chen <sup>a</sup>

<sup>a</sup> *Chongqing Key Laboratory of Inorganic Special Functional Materials, College of Chemistry and Chemical Engineering, Yangtze Normal University, Fuling, Chongqing 408100, China*

<sup>b</sup> *Postdoctoral mobile station of Basic Medical Sciences, Hengyang Medical School, University of South China, Hengyang 421001, China*

<sup>c</sup> *Chongqing Wankai New Materials Technology Co., Ltd, Fuling, Chongqing 408121, China.*

\* To whom correspondence should be addressed.

E-mail:                wyan2018@163.com,                Tel& Fax:                +86-0734-8282133

|                                                                      |              |
|----------------------------------------------------------------------|--------------|
| <b>1. Materials and apparatus.....</b>                               | <b>(S3)</b>  |
| <b>2. Preparation of Fe NPs.....</b>                                 | <b>(S4)</b>  |
| <b>3. The operation of reusability experiment in Figure S8B.....</b> | <b>(S5)</b>  |
| <b>4. Figure S1.....</b>                                             | <b>(S6)</b>  |
| <b>5. Figure S2.....</b>                                             | <b>(S7)</b>  |
| <b>6. Figure S3.....</b>                                             | <b>(S8)</b>  |
| <b>7. Figure S4.....</b>                                             | <b>(S9)</b>  |
| <b>8. Figure S5.....</b>                                             | <b>(S10)</b> |
| <b>9. Figure S6.....</b>                                             | <b>(S11)</b> |
| <b>10. Figure S7.....</b>                                            | <b>(S12)</b> |
| <b>11. Figure S8.....</b>                                            | <b>(S13)</b> |
| <b>12. Figure S9.....</b>                                            | <b>(S14)</b> |
| <b>13. Figure S10.....</b>                                           | <b>(S15)</b> |
| <b>14. Figure S11.....</b>                                           | <b>(S16)</b> |
| <b>15. Figure S12.....</b>                                           | <b>(S17)</b> |
| <b>16. Table S1.....</b>                                             | <b>(S18)</b> |
| <b>17. Table S2.....</b>                                             | <b>(S19)</b> |
| <b>18. Table S3.....</b>                                             | <b>(S20)</b> |
| <b>19. References.....</b>                                           | <b>(S21)</b> |

## Materials and apparatus

Iron(III) chloride hexahydrate ( $\text{FeCl}_3 \cdot 6\text{H}_2\text{O}$ ), xanthine, and sodium borohydride ( $\text{NaBH}_4$ ) were obtained from Aladdin Reagent Co., Ltd. (Shanghai, China). Xanthine oxidase (XOD) and ascorbic acid were obtained from Shanghai Yuanye Biological Technology Co., Ltd. (Shanghai, China). Glucose, L-cysteine, uric acid, L-lysine, cholesterol, L-tyrosine, D-fructose, lactose, D-maltose monohydrate, glutathione,  $\text{NaHPO}_4^{3-}$ , and  $\text{H}_2\text{O}_2$  were bought from Shanghai Titan Technology Co., Ltd. (Shanghai, China). TMB was purchased from Adamas Reagent Co., Ltd. (Shanghai, China), 2',7'-dichlorofluorescein (DCF) was purchased from Macklin Biochemical Co., Ltd (Shanghai, China). Thiourea, *p*-benzoquinone, and  $\text{NaN}_3$  were purchased from Kelong Chemical Reagent Co., Ltd. (Chengdu, China). All the human serum samples were achieved from the School Hospital.

The XRD was performed on a D/MAX-2500 (Rigaku, USA). The XPS study was conducted by K-ALPHA (Thermo Fisher Scientific, U.K.). A Hitachi U-4100 spectrometer (Japan) was used to record UV-vis absorption spectra. Magnetic Fe NPs were characterized using a FEI Tecnai G2 F20 transmission electron microscope (TEM). The magnetic performance of Fe NPs was researched by a PPMS-9T vibrating-sample magnetometer (USA). Radical signals were measured by electron spin resonance (ESR, Bruker EMXplus).

### **Preparation of Fe NPs**

According to the reported method,<sup>1</sup> the synthesis procedure of magnetic Fe NPs was as follows: typically, 0.6768 g of  $\text{FeCl}_3 \cdot 6\text{H}_2\text{O}$  and 0.2891 g of  $\text{NaBH}_4$  were dispersed in 100 mL ddH<sub>2</sub>O, respectively. The  $\text{NaBH}_4$  solution was quickly added to the  $\text{FeCl}_3$  solution. Subsequently, the mixed solution was stirred and reacted for 1 h. The obtained black outcome was washed with ddH<sub>2</sub>O and ethanol, respectively. At last, the obtained product was dried at 60 °C for 8 h, and saved in a dry environment for subsequent experiments.

### **The operation of reusability experiment in Figure S8B**

The reusability experiment was performed under the same conditions of the analysis (pH 3.5 NaAc-HAc buffer, Fe NPs 1 mg/mL, H<sub>2</sub>O<sub>2</sub> 100 μM, TMB 5mM, react at room temperature, reaction time 10 min). The volume of reaction system was enlarged for 300 times from 3.0 mL to 900 mL. After reaction for 10 min, the Fe NPs was collected with magnet and washed by ethanol for twice and then dried at 60 °C under vacuum condition. About 4.0 mg power could be collected. The collected Fe NPs nanozyme can be employed for the second cycle in detection of H<sub>2</sub>O<sub>2</sub>.

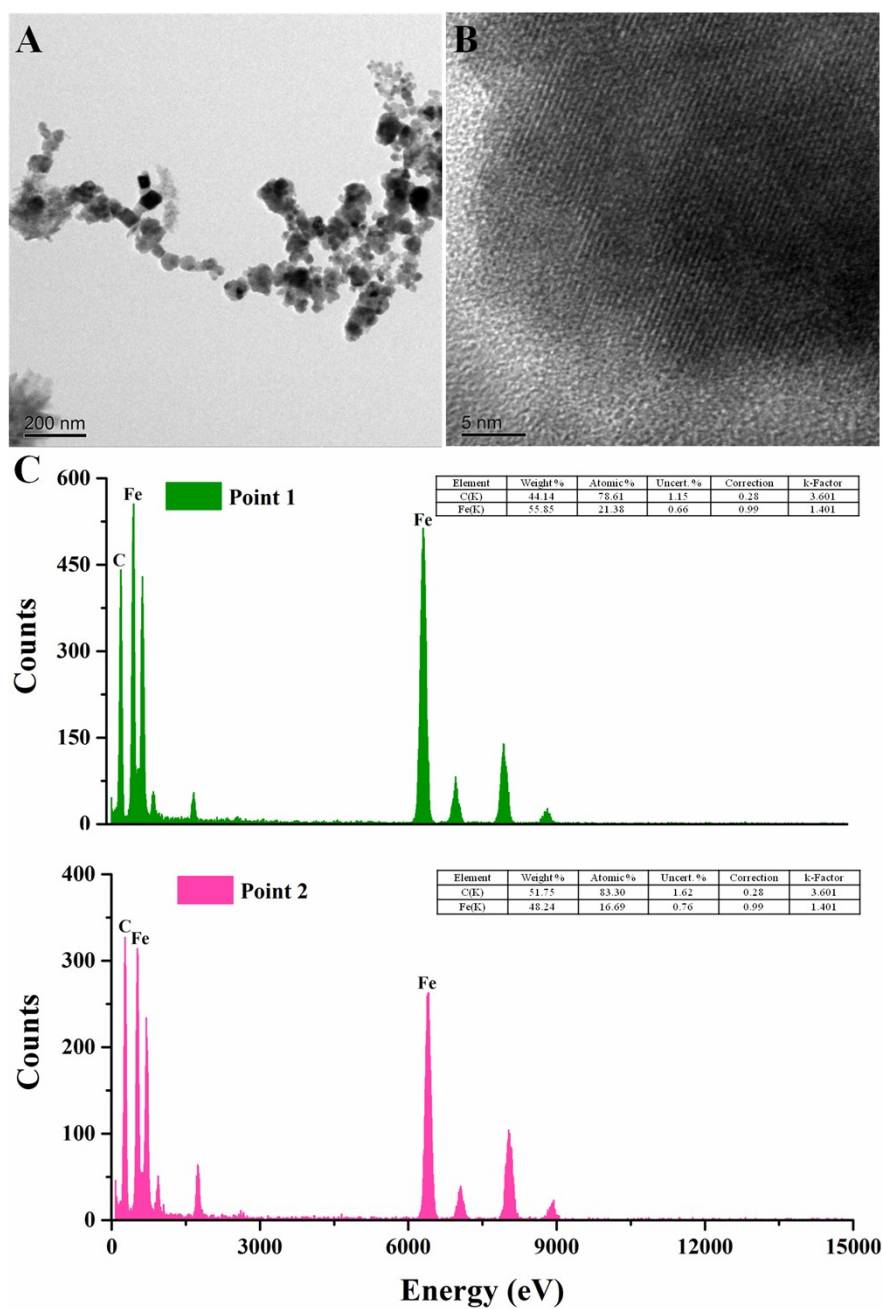

**Figure S1.** (a) TEM and (b) HRTEM images of Fe NPs. (c) EDX spectra of different points of outer shell of Fe NPs.

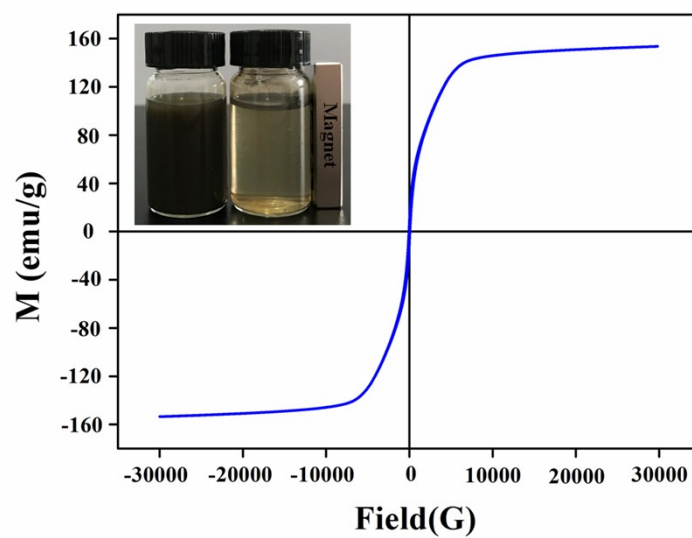

**Figure S2.** Magnetic hysteresis curve of Fe NPs. Inset: pictures of Fe NPs in solution with and without a magnet.

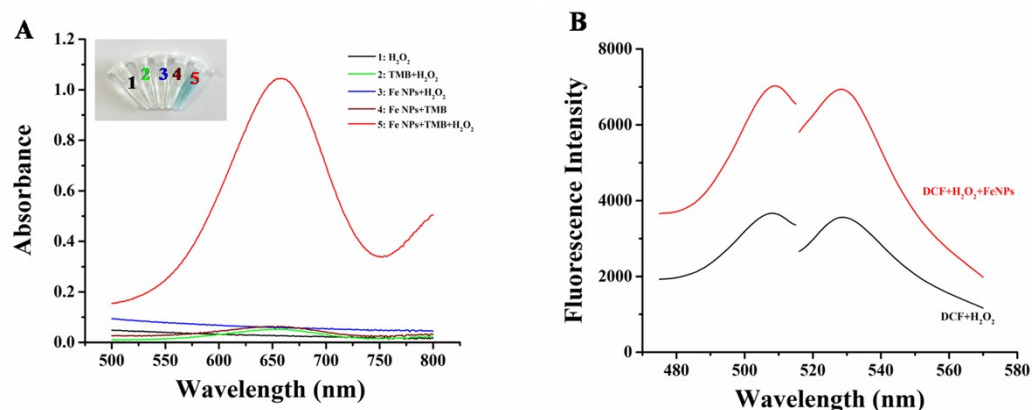

**Figure S3.** (A) Absorption spectra of  $H_2O_2$ , TMB +  $H_2O_2$ , Fe NPs nanozyme +  $H_2O_2$ , Fe NPs nanozyme + TMB , and Fe NPs nanozyme + TMB +  $H_2O_2$ . Inset is the corresponding photographs of five reactions (from left to right):  $H_2O_2$ , TMB +  $H_2O_2$ , Fe NPs nanozyme +  $H_2O_2$ , Fe NPs nanozyme + TMB , and Fe NPs nanozyme + TMB +  $H_2O_2$ . (B) Excitation and emission spectra of DCF in the presence of Fe NPs nanozyme (red line) and absence of Fe NPs nanozyme (black line).

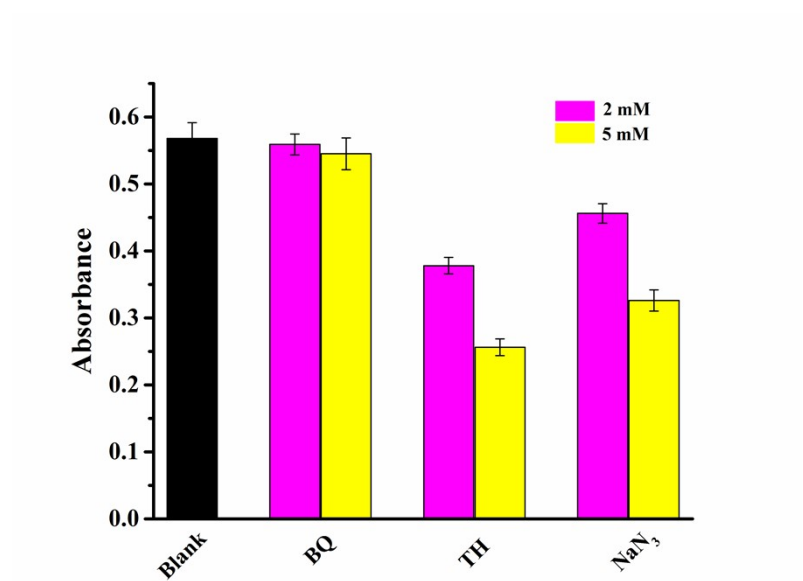

**Figure S4.**  $A_{652}$  variance of the TMB/ $H_2O_2$ /Fe NPs system in the presence of BQ, TH, and  $NaN_3$ .

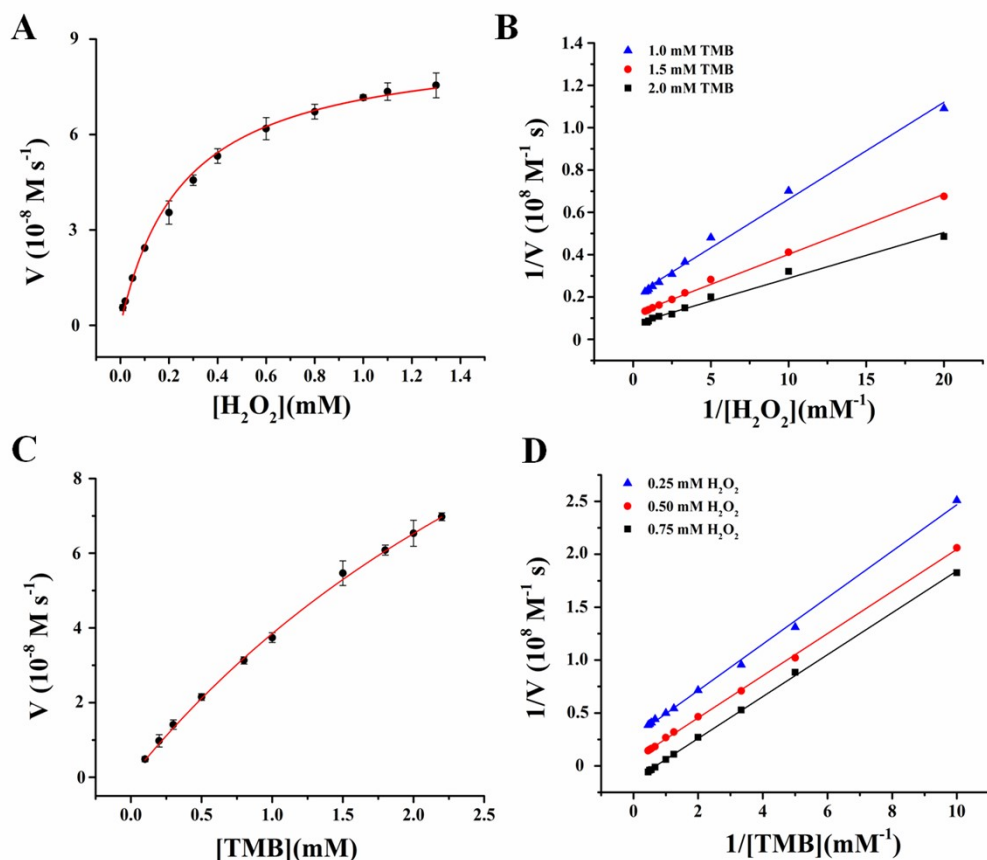

**Figure S5.** An analysis of the steady-state kinetics of the Fe NPs-based catalytic system employing the Michaelis-Menten model (A and C) and Lineweaver-Burk double-reciprocal model (B and D). (A) Reaction velocity plots with a unchanged TMB concentration (1.5 mM) and  $\text{H}_2\text{O}_2$  concentration changed. (C) Reaction velocity plots with a unchanged  $\text{H}_2\text{O}_2$  concentration (0.5 mM) and TMB concentration varied. (B) and (D) Double reciprocal plots of the catalytic system with the content of one substrate ( $\text{H}_2\text{O}_2$  or TMB) changed. The catalytic system was performed at pH 3.5 with  $1 \text{ mg.mL}^{-1}$  of Fe NPs.

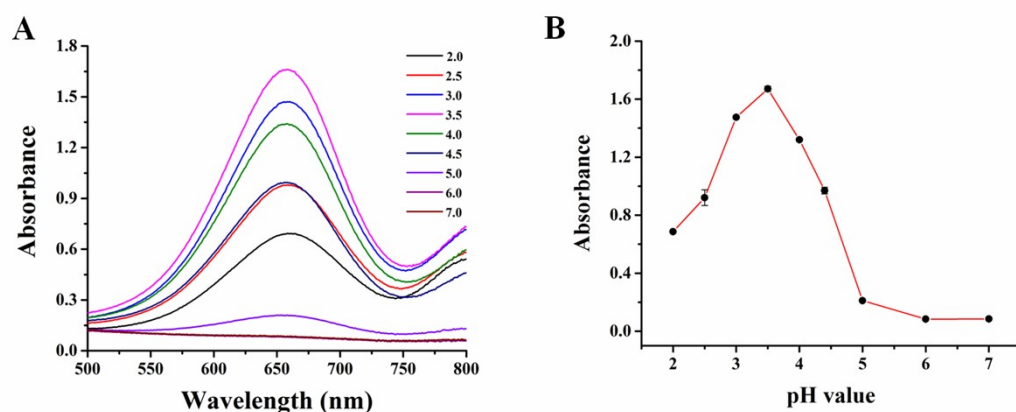

**Figure S6.** UV-vis absorption spectra of (A) pH value of Fe NPs nanoenzyme. Optimum conditions for xanthine response based on the Fe NPs nanozyme sensing platform. (B) pH value of the Fe NPs nanozyme. The error bar represents the deviation of three determinations.

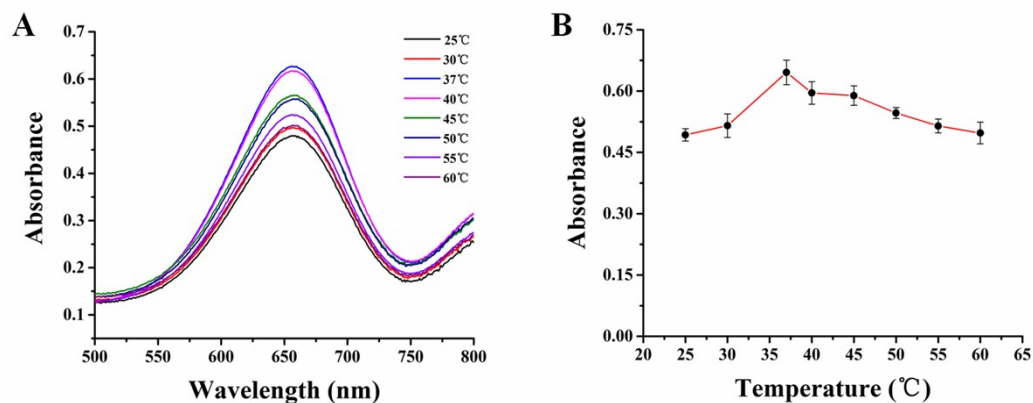

**Figure S7.** UV-vis absorption spectra of (A) incubation temperature between XOD and xanthine. Optimum conditions for xanthine response based on the Fe NPs nanozyme sensing platform. (B) incubation temperature between XOD and xanthine. The error bar represents the deviation of three determinations.

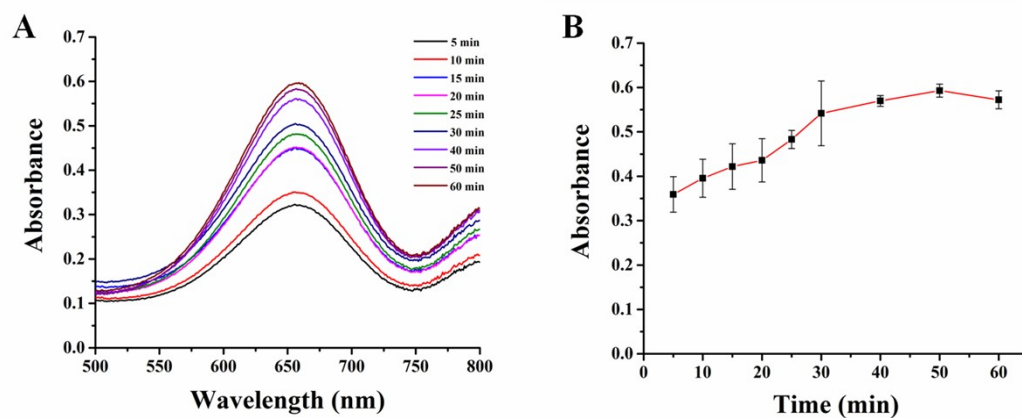

**Figure S8.** UV-vis absorption spectra of (A) incubation time between XOD and xanthine. Optimum conditions for xanthine response based on the Fe NPs nanozyme sensing platform. (B) incubation time between XOD and xanthine. The error bar represents the deviation of three determinations.

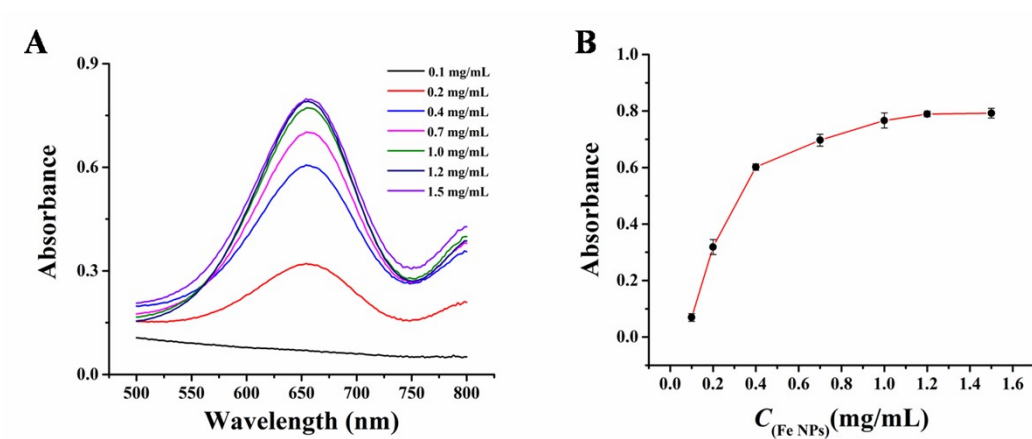

**Figure S9.** UV-vis absorption spectra of (A) concentration of Fe NPs nanozyme. Optimum conditions for xanthine response based on the Fe NPs nanozyme sensing platform. (B) concentration of Fe NPs nanozyme. The error bar represents the deviation of three determinations.

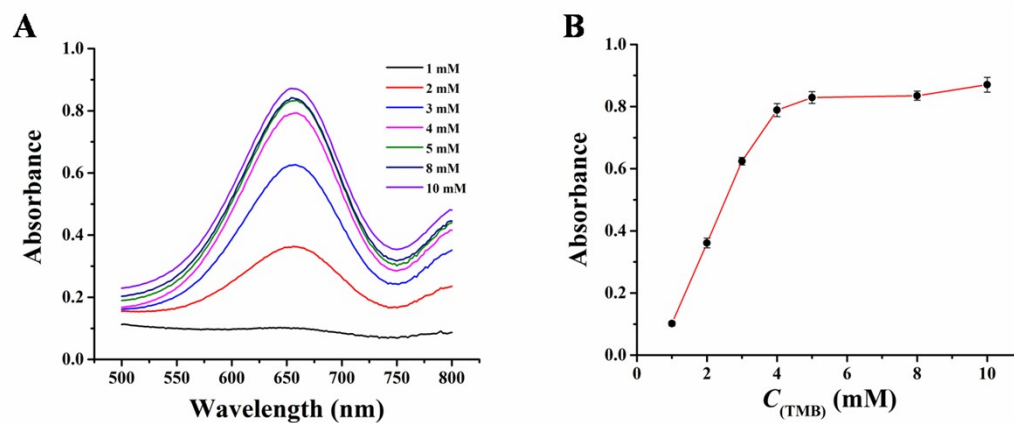

**Figure S10.** UV-vis absorption spectra of (A) concentration of TMB. Optimum conditions for xanthine response based on the Fe NPs nanozyme sensing platform. (B) concentration of TMB. The error bar represents the deviation of three determinations.

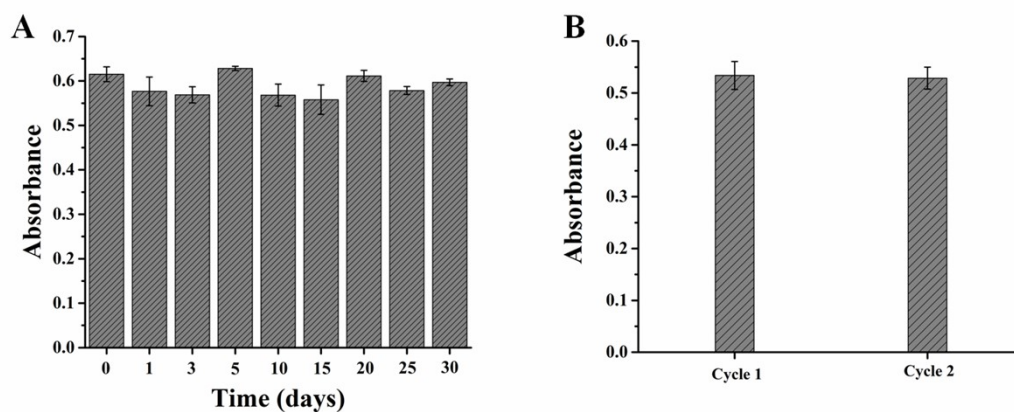

**Figure S11.** (A) The stability and (B) the reusability of the Fe NPs nanozyme for colorimetric detection of xanthine (50  $\mu\text{M}$ ). The error bar represents the deviation of three determinations.

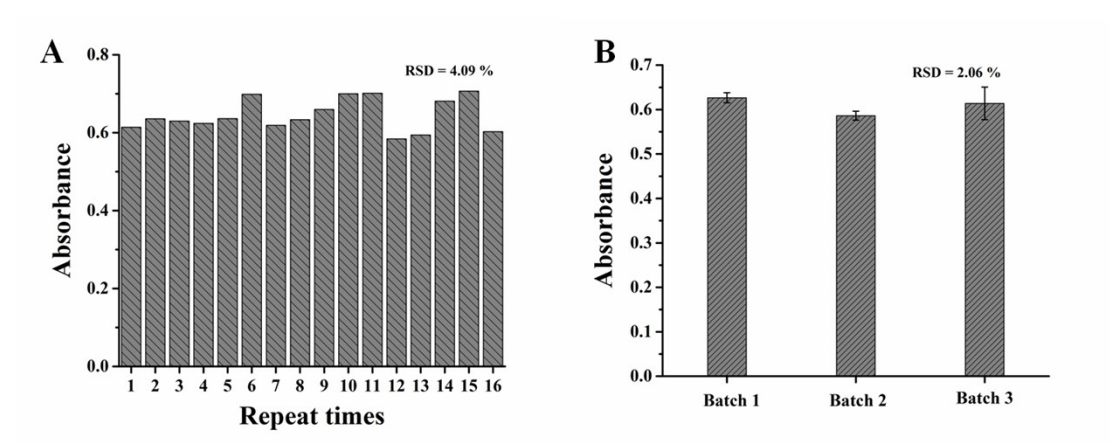

**Figure S12.** (A) The reproducibility testing and (B) the batch-to-batch repeatability of the Fe NPs nanozyme for colorimetric detection of xanthine (50 μM).

**Table S1.** Catalytic factors of various peroxidase nanozymes

| catalyst                          | substrate                     | $K_m$ (mM) | $V_{max}$ ( $10^{-8}$ M s $^{-1}$ ) | reference |
|-----------------------------------|-------------------------------|------------|-------------------------------------|-----------|
| Fe NPs                            | H <sub>2</sub> O <sub>2</sub> | 0.024      | 8.5                                 | this work |
|                                   | TMB                           | 0.36       | 17.98                               |           |
| HRP                               | H <sub>2</sub> O <sub>2</sub> | 3.7        | 8.71                                | 2         |
|                                   | TMB                           | 0.434      | 10                                  |           |
| MoS <sub>2</sub>                  | H <sub>2</sub> O <sub>2</sub> | 0.0116     | 4.29                                | 3         |
|                                   | TMB                           | 0.525      | 5.16                                |           |
| Au NPs                            | H <sub>2</sub> O <sub>2</sub> | 61.34      | 0.663                               | 4         |
|                                   | TMB                           | 0.11       | 1.539                               |           |
| Fe-MIL-88-NH <sub>2</sub>         | H <sub>2</sub> O <sub>2</sub> | 0.206      | 7.04                                | 5         |
|                                   | TMB                           | 0.284      | 10.47                               |           |
| Fe-PDA                            | H <sub>2</sub> O <sub>2</sub> | 0.16       | 21.49                               | 6         |
|                                   | TMB                           | 0.4        | 20.59                               |           |
| MoSe <sub>2</sub>                 | H <sub>2</sub> O <sub>2</sub> | 0.155      | 0.99                                | 7         |
|                                   | TMB                           | 0.014      | 0.56                                |           |
| Au <sub>21</sub> Pd <sub>79</sub> | H <sub>2</sub> O <sub>2</sub> | 5.89       | 8.19                                | 8         |
|                                   | TMB                           | 0.295      | 19.65                               |           |
| Fe <sub>3</sub> O <sub>4</sub>    | H <sub>2</sub> O <sub>2</sub> | 2.995      | 0.9193                              | 9         |
|                                   | TMB                           | 31.20      | 1.614                               |           |
| Fe-N-C SACs                       | H <sub>2</sub> O <sub>2</sub> | 13.18      | 26.62                               | 10        |
|                                   | TMB                           | 0.96       | 132.58                              |           |
| Fe-CDs                            | H <sub>2</sub> O <sub>2</sub> | 0.58       | 4.23                                | 11        |
|                                   | TMB                           | 0.18       | 5.97                                |           |
| Fe@MoS <sub>2</sub>               | H <sub>2</sub> O <sub>2</sub> | 0.030      | 2.01                                | 12        |
|                                   | TMB                           | /          | /                                   |           |
| Fe SACs                           | H <sub>2</sub> O <sub>2</sub> | /          | /                                   | 13        |
|                                   | TMB                           | 0.156      | 0.219                               |           |
| NO <sub>2</sub> -MIL-101          | H <sub>2</sub> O <sub>2</sub> | 1.10       | 88.9                                | 14        |
|                                   | TMB                           | 9.01       | 150.3                               |           |

**Table S2.** The comparison of the proposed colorimetric methods with other approaches for xanthine detection.

| Method                   | Linear range             | Limit of detection   | Reference |
|--------------------------|--------------------------|----------------------|-----------|
| Photoluminescent         | 1-50 $\mu\text{M}$       | 0.34 $\mu\text{M}$   | 15        |
| Electrochemical          | 1-100 $\mu\text{M}$      | 70 nM                | 16        |
| Colorimetric             | 0.01-0.32 mM             | 1.964 $\mu\text{M}$  | 7         |
| Colorimetric             | 0.01-0.5 mM              | 4.37 $\mu\text{M}$   | 17        |
| Colorimetric             | 125 nM-6.0 $\mu\text{M}$ | 23 nM                | 18        |
| Electrochemical          | 0.7-200.0 $\mu\text{M}$  | 28 nM                | 19        |
| Colorimetric             | 0.001-0.05 mM            | 0.29 mM              | 20        |
| Colorimetric             | 0.16-40 $\mu\text{M}$    | 0.016 $\mu\text{M}$  | 21        |
| Electrochemical          | 0.10-20 $\mu\text{M}$    | 0.006 $\mu\text{M}$  | 22        |
| Photoelectrochemical     | 0.04-90 $\mu\text{M}$    | 6.6 nM               | 23        |
| Surface plasma resonance | 0-3 $\mu\text{M}$        | 0.0127 $\mu\text{M}$ | 24        |
| Electrochemical          | 0.8-450 $\mu\text{M}$    | 0.4 $\mu\text{M}$    | 25        |
| Colorimetric             | 0.1-80 $\mu\text{M}$     | 0.034 $\mu\text{M}$  | This work |

**Table S3.** Assay results for xanthine detection in serum sample by the proposed method

| serum samples   | xanthine ( $\mu\text{M}$ ) |                       |         | recovery (%) |
|-----------------|----------------------------|-----------------------|---------|--------------|
|                 | added                      | found (mean $\pm$ SD) | RSD (%) |              |
| <b>Sample 1</b> | 5.0                        | 5.32 $\pm$ 0.28       | 5.3     | 106.4        |
|                 | 10.0                       | 10.78 $\pm$ 0.39      | 3.6     | 107.8        |
|                 | 50.0                       | 53.56 $\pm$ 2.51      | 4.7     | 107.1        |
| <b>Sample 2</b> | 5.0                        | 4.98 $\pm$ 0.34       | 6.8     | 99.6         |
|                 | 10.0                       | 10.92 $\pm$ 0.53      | 4.9     | 109.2        |
|                 | 50.0                       | 51.53 $\pm$ 1.95      | 3.8     | 103.1        |
| <b>Sample 3</b> | 5.0                        | 5.16 $\pm$ 0.19       | 3.7     | 103.2        |
|                 | 10.0                       | 10.54 $\pm$ 0.42      | 4.0     | 105.4        |
|                 | 50.0                       | 48.75 $\pm$ 2.12      | 4.3     | 97.5         |

## References

- 1 L. Zhang, J. Wang, C. Zhao, F. Zhou, C. Yao and C. Song, *Sens. Actuators B Chem.*, 2022, **361**, 131750.
- 2 L. Gao, J. Zhuang, L. Nie, J. Zhang, Y. Zhang and N. Gu, *Nat. Nanotechnol.*, 2007, **2**, 577-583.
- 3 T. Lin, L. Zhong, L. Guo, F. Fu and G. Chen, *Nanoscale*, 2014, **6**, 11856-11862.
- 4 Q. Xue, X. Niu, P. Liu, M. Wang, Y. Peng and H. Peng, *Sens. Actuators B Chem.*, 2021, **334**, 129650.
- 5 Y.L. Liu, X.J. Zhao, X.X. Yang and Y.F. Li, *Analyst*, 2013, **138**, 4526-4531.
- 6 Y. Zhang, X. Gao, Y. Ye and Y. Shen, *Analyst*, 2022, **147**, 956-964.
- 7 X. Wu, T. Chen, J. Wang and G. Yang, *J. Mater. Chem. B*, 2018, **6**, 105-111.
- 8 S. Cai, Z. Fu, W. Xiao, Y. Xiong, C. Wang and R. Yang, *ACS Appl. Mater. Interfaces*, 2020, **12**, 11616-11624.
- 9 H. Dong, W. Du, J. Dong, R. Chen, F. Kong, W. Cheng, M. Ma, N. Gu and Y. Zhang, *Nature Commun.*, 2022, **13**, 5365.
- 10 S. Ding, J.A. Barr, Z. Lyu, F. Zhang and M. Wang, *Adv. Mater.*, 2023, 2209633.
- 11 R. Qin, Y. Feng, D. Ding, L. Chen and S. Li, *ACS Appl. Bio Mater.*, 2021, **4**, 5520-5528.
- 12 S.R. Ali and M. De, *ACS Appl. Mater. Interfaces*, 2022, **14**, 42940-42949.
- 13 J. Liu, L. Gong, H. Chen, J. Gui and X. Zhu, *ACS Appl. Nano Mater.*, 2023, **6**, 5879-5888.
- 14 W. Xu, Y. Kang, L. Jiao, Y. Wu and H. Yan, *Nano-Micro Lett.*, 2020, **12**, 184.
- 15 Q. Lu, J. Wang, B. Li, C. Weng, X. Li and W. Yang, *Anal. Chem.*, 2020, **92**, 7770-7777.
- 16 W. Zheng, J. Yao and Y. Zhao, *Anal. Chem.*, 2021, **93**, 13080-13088.
- 17 C. Hong, L. Guan, L. Huang, X. Hong and Z. Huang, *New J. Chem.*, 2021, **45**, 10459-10465.
- 18 W. Pu, H. Zhao, L. Wu and X. Zhao, *Microchim. Acta*, 2015, **182**, 395-400.
- 19 Y. Cui, J. Li, M. Liu, H. Tong, Z. Liu and J. Hu, *Microchim. Acta*, 2020, **187**, 589.

- 20 W. Shi, H. Fan, S. Ai and L. Zhu, *RSC Adv.*, 2015, **5**, 32183-32190.
- 21 F. Qiao, J. Wang, S. Ai and L. Li, *Sens. Actuators B. Chem.*, 2015, **216**, 418-427.
- 22 Y. Wang, H. Zhao, H. Song, J. Dong and J. Xu, *Microchim. Acta*, 2020, **187**, 543.
- 23 X. Chen, P. Li, C. Luo and C. Huang, *Chem. Electro. Chem.*, 2022, **9**, e202200237.
- 24 R. Kant, R. Tabassum and B.D. Gupta, *Biosens. Bioelectron.*, 2018, **99**, 637-645.
- 25 M. Roostaei and I. Sheikhshoaei, *J. Food Meas. Charact.*, 2022, **16**, 731-739.
